# Supplementary material for: Maternal Coronary Heart Disease, Stroke, and Mortality Within 1, 3, and 5 Years of Delivery Among Women With Hypertensive Disorders of Pregnancy and Pre‐Pregnancy Hypertension
Source: PubMed Central journal article supplement — J Am Heart Assoc. 2021 Feb 23;10(5):e018155. doi: 10.1161/JAHA.120.018155 (PMC8174275; doi:10.1161/jaha.120.018155), 2021-02-23
Supplement: JAH3-10-e018155-s001.pdf [file JAH3-10-e018155-s001.pdf]

# **SUPPLEMENTAL MATERIAL**

**Table S1. Diagnoses for the exposure, covariates, and outcomes of interest based on hospitalization and emergency department International Classification of Diseases, Ninth and Tenth Revision, Clinical Modification (ICD-9-CM) and (ICD-10-CM) codes or as reported on birth certificates or death certificates**

| <b>DIAGNOSIS</b>                                                                                                                                                                                                                                                                                                                                                                                                                                                        | <b>ICD-9-CM CODE</b>                        | <b>ICD-10-CM CODE</b>                    |
|-------------------------------------------------------------------------------------------------------------------------------------------------------------------------------------------------------------------------------------------------------------------------------------------------------------------------------------------------------------------------------------------------------------------------------------------------------------------------|---------------------------------------------|------------------------------------------|
| Outcome of delivery (birth) *                                                                                                                                                                                                                                                                                                                                                                                                                                           | V27.x, V30.x, 640-649, 650-659, 660-669     | Z37.x                                    |
| Single liveborn; single live birth *                                                                                                                                                                                                                                                                                                                                                                                                                                    | V27.0, V30.0                                | Z37.0                                    |
| Diabetes (maternal/gestational)                                                                                                                                                                                                                                                                                                                                                                                                                                         | 250.00-250.92, 648.01-648.02, 648.81-648.82 | E10.x, E11.x, O24.0-O24.3, O24.4, O24.9, |
| Pre-pregnancy diabetes (birth certificate)                                                                                                                                                                                                                                                                                                                                                                                                                              | --                                          | --                                       |
| Gestational diabetes (birth certificate)                                                                                                                                                                                                                                                                                                                                                                                                                                | --                                          | --                                       |
| Kidney transplant                                                                                                                                                                                                                                                                                                                                                                                                                                                       | procedure code: 55.6, V42.0                 | Z94.0                                    |
| <b>Coronary heart disease (CHD)</b>                                                                                                                                                                                                                                                                                                                                                                                                                                     |                                             |                                          |
| Ischemic heart disease, Atherosclerosis, Cardiovascular disease, unspecified; Atherosclerotic heart disease of native coronary artery without angina pectoris                                                                                                                                                                                                                                                                                                           | 410.x-414.x, 429.2, 440                     | I20.x, I21.x, I24.x, I25.x, I70          |
| <b>Stroke</b>                                                                                                                                                                                                                                                                                                                                                                                                                                                           |                                             |                                          |
| Acute ischemic stroke                                                                                                                                                                                                                                                                                                                                                                                                                                                   | 430, 431, 433.x1, 434.x1, 436               | I60.9, I61.9, I62.x, I63x, I66.x, I67.x  |
| <b>Hypertensive disorders of pregnancy (HDP)</b>                                                                                                                                                                                                                                                                                                                                                                                                                        |                                             |                                          |
| Gestational hypertension, Pre-eclampsia, Eclampsia, Pre-existing hypertension with pre-eclampsia                                                                                                                                                                                                                                                                                                                                                                        | 642.3-642.7                                 | O11.x, O13.x-O.16.x                      |
| Gestational hypertension (birth certificate)                                                                                                                                                                                                                                                                                                                                                                                                                            | --                                          | --                                       |
| <b>Pre-pregnancy hypertension</b>                                                                                                                                                                                                                                                                                                                                                                                                                                       |                                             |                                          |
| Benign essential hypertension complicating pregnancy, childbirth, and the puerperium; Hypertension secondary to renal disease complicating pregnancy, childbirth, and the puerperium; Other pre-existing hypertension complicating pregnancy, childbirth, and the puerperium; Pre-existing essential hypertension complicating pregnancy, childbirth, and the puerperium, Pre-existing hypertensive heart disease complicating pregnancy, childbirth and the puerperium | 642.0-642.2                                 | O10.0                                    |
| Pre-pregnancy hypertension (birth certificate)                                                                                                                                                                                                                                                                                                                                                                                                                          | --                                          | --                                       |
| <b>Pre-pregnancy hypertension with superimposed HDP †</b>                                                                                                                                                                                                                                                                                                                                                                                                               |                                             |                                          |
| Pre-eclampsia or eclampsia superimposed on pre-existing hypertension; Pre-existing hypertension with pre-eclampsia                                                                                                                                                                                                                                                                                                                                                      | 642.7                                       | O13.x-O15.x                              |

\* Obtained from the mother's hospitalization/emergency department visit record.

† Also defined by a combination of the above diagnosis codes for hypertensive disorders of pregnancy and pre-pregnancy hypertension.

**Table S2. Demographic and clinical characteristics of mothers at index birth in South Carolina stratified by racial/ethnic group, 2004-2016** <sup>\*,†,‡,§</sup>

| Characteristic                             | Non-Hispanic     | Non-Hispanic     | Hispanic       | p-value <sup>  </sup> |
|--------------------------------------------|------------------|------------------|----------------|-----------------------|
|                                            | white            | black            |                |                       |
| n (%) or mean ±SD                          | N=254,491 (58.7) | N=137,784 (31.8) | N=41,155 (9.5) |                       |
| Neither pre-pregnancy hypertension nor HDP | 211,871 (83.3)   | 105,092 (76.3)   | 36,612 (89.0)  | <0.0001               |
| Pre-pregnancy hypertension alone           | 716 (0.3)        | 760 (0.6)        | 114 (0.3)      |                       |
| HDP alone                                  | 37,544 (14.8)    | 26,583 (19.3)    | 4,087 (9.9)    |                       |
| Both pre-pregnancy hypertension and HDP    | 4,360 (1.7)      | 5,347 (3.9)      | 342 (0.8)      |                       |
| Maternal age at delivery                   | 28.4±5.8         | 26.5±5.9         | 27.6±6.0       | <0.0001               |
| Education                                  |                  |                  |                |                       |
| <High school                               | 29,083 (11.4)    | 24,083 (17.5)    | 22,326 (54.2)  | <0.0001               |
| High school graduate                       | 55,580 (21.8)    | 43,356 (31.5)    | 8,411 (20.4)   |                       |
| Some college                               | 63,471 (24.9)    | 43,048 (31.2)    | 5,216 (12.7)   |                       |
| ≥College graduate                          | 106,357 (41.8)   | 27,297 (19.8)    | 5,202 (12.6)   |                       |
| Rural residence                            | 56,802 (22.3)    | 46,519 (33.8)    | 11,011 (26.8)  | <0.0001               |
| Annual household income                    |                  |                  |                |                       |
| <\$36,000                                  | 46,942 (18.4)    | 61,372 (44.5)    | 9,723 (23.6)   | <0.0001               |
| \$36,000-<\$54,000                         | 131,233 (51.6)   | 53,797 (39.0)    | 19,645 (47.7)  |                       |

|                                        |                |               |               |         |
|----------------------------------------|----------------|---------------|---------------|---------|
| ≥\$54,000                              | 70,272 (27.6)  | 21,095 (15.3) | 10,341 (25.1) |         |
| Primary payer during pregnancy         |                |               |               |         |
| Medicaid                               | 97,886 (38.5)  | 95,778 (69.5) | 18,245 (44.3) | <0.0001 |
| Private                                | 131,820 (51.8) | 33,639 (24.4) | 6,103 (14.8)  |         |
| Self-pay                               | 6,565 (2.6)    | 2,409 (1.7)   | 13,250 (32.2) |         |
| Other                                  | 16,732 (6.6)   | 5,052 (3.7)   | 2,820 (6.9)   |         |
| WIC eligibility in pregnancy           | 91,532 (36.0)  | 99,137 (72.0) | 26,002 (63.2) | <0.0001 |
| Pre-pregnancy smoking                  | 51,330 (20.2)  | 13,874 (10.1) | 1,523 (3.7)   | <0.0001 |
| Pre-pregnancy BMI (kg/m <sup>2</sup> ) | 26.5±6.5       | 29.4±7.4      | 26.9±5.6      | <0.0001 |
| Pre-pregnancy or gestational diabetes  | 16,758 (6.6)   | 10,218 (7.4)  | 3,183 (7.7)   | <0.0001 |
| Prenatal care as measured by R-GINDEX  |                |               |               |         |
| Inadequate                             | 47,417 (18.6)  | 22,285 (16.2) | 7,588 (18.4)  | <0.0001 |
| Intermediate                           | 64,638 (25.4)  | 24,753 (18.0) | 6,232 (15.1)  |         |
| Adequate                               | 4,227 (1.7)    | 2,089 (1.5)   | 419 (1.0)     |         |
| Intensive                              | 77,280 (30.4)  | 39,016 (28.3) | 7,254 (17.6)  |         |
| No care                                | 1,537 (0.6)    | 1,717 (1.2)   | 883 (2.1)     |         |
| Missing                                | 59,392 (23.3)  | 47,924 (34.8) | 18,779 (45.6) |         |

BMI, body mass index; HDP, hypertensive disorders of pregnancy; R-GINDEX, Revised Graduated Prenatal Care Utilization Index; SD, standard deviation; WIC, Women, Infants, and Children.

\* Data includes person-level diagnostic codes at time of discharge or birth certificate. Hypertensive disorders of pregnancy (HDP) were defined as gestational

hypertension, pre-eclampsia, or eclampsia (International Classification of Diseases, Ninth and Tenth Revision, Clinical Modification [ICD-9-CM/ICD-10-CM]: 642.3-642.7; O11.x, O13.x-O16.x) based on hospitalization/emergency department (ED) visit data, or gestational hypertension as reported on the birth certificate. Pre-pregnancy hypertension was based on hospitalization/ED visit data or birth certificates.

† For pre-pregnancy smoking,  $\leq 0.1\%$  of data are missing and not shown.

‡ Variables with  $>0.1\%$  missing data included: annual household income,  $n=9,010$ ; primary payer during pregnancy,  $n=3,131$ ; Women, Infants, and Children eligibility in pregnancy,  $n=6,583$ ; and prenatal care as measured by R-GINDEX,  $n=126,095$ .

§ Pre-pregnancy smoking, pre-pregnancy BMI, pre-pregnancy diabetes, and gestational diabetes were available from the birth certificate. Gestational diabetes was also defined using hospitalization/ED visit data based on ICD-9-CM and ICD-10-CM codes.

¶  $P$ -values were calculated by Chi-square tests for categorical variables or analysis of variance (ANOVA) for continuous variables.

**Table S3.** Characteristics of mothers and infants at index pregnancy in South Carolina including prenatal data, complications, and delivery variables overall and by hypertensive disorders of pregnancy (HDP) and pre-pregnancy hypertension (HTN) status, 2004-2016 <sup>\*, †, ‡, §</sup>

| Characteristic                       | Total          | Neither pre-preg<br>HTN nor HDP | Pre-preg<br>HTN alone | HDP alone       | Both pre-preg<br>HTN and HDP | p-value <sup>  </sup> |
|--------------------------------------|----------------|---------------------------------|-----------------------|-----------------|------------------------------|-----------------------|
|                                      | N=433,430      | N=353,575 (81.6)                | N=1,591 (0.4)         | N=68,212 (15.7) | N=10,052 (2.3)               |                       |
| <b>Maternal age at delivery</b>      |                |                                 |                       |                 |                              |                       |
| <20                                  | 32,207 (7.4)   | 27,089 (7.7)                    | 62 (3.9)              | 4,736 (6.9)     | 320 (3.2)                    | <0.0001               |
| 20-24                                | 109,944 (25.4) | 91,351 (25.8)                   | 268 (16.8)            | 16,913 (24.8)   | 1,412 (14.0)                 |                       |
| 25-29                                | 126,182 (29.1) | 103,381 (29.2)                  | 420 (26.4)            | 19,775 (29.0)   | 2,606 (25.9)                 |                       |
| 30-34                                | 103,087 (23.8) | 83,516 (23.6)                   | 427 (26.8)            | 16,183 (23.7)   | 2,961 (29.5)                 |                       |
| 35-39                                | 50,673 (11.7)  | 39,768 (11.2)                   | 313 (19.7)            | 8,501 (12.5)    | 2,091 (20.8)                 |                       |
| 40-49                                | 11,337 (2.6)   | 8,470 (2.4)                     | 101 (6.3)             | 2,104 (3.1)     | 662 (6.6)                    |                       |
| Smoking during pregnancy             | 51,749 (11.9)  | 42,627 (12.1)                   | 179 (11.3)            | 7,840 (11.5)    | 1,103 (11.0)                 | 0.0048                |
| BMI at delivery (kg/m <sup>2</sup> ) | 32.3 ±6.6      | 31.5 ±6.2                       | 36.4 ±7.7             | 35.4 ±7.3       | 38.1 ±7.7                    | <0.0001               |
| Underweight (<18.5)                  | 237 (0.1)      | 213 (0.1)                       | 1 (0.1)               | 19 (0.0)        | 4 (0.0)                      | <0.0001               |
| Normal weight (18.5 to <25)          | 44,630 (10.3)  | 40,792 (11.5)                   | 73 (4.6)              | 3,497 (5.1)     | 268 (2.7)                    |                       |
| Overweight (25 to <30)               | 138,466 (31.9) | 123,232 (34.9)                  | 280 (17.6)            | 13,689 (20.1)   | 1,265 (12.6)                 |                       |
| Obese (≥30)                          | 248,337 (57.3) | 187,906 (53.1)                  | 1,231 (77.4)          | 50,736 (74.4)   | 8,464 (84.2)                 |                       |
| Gestational age at delivery (weeks)  | 38.4 ±1.9      | 38.6 ±1.7                       | 37.8 ±2.4             | 37.7 ±2.3       | 37.1 ±2.7                    | <0.0001               |
| <28                                  | 2,054 (0.5)    | 1,332 (0.4)                     | 18 (1.1)              | 549 (0.8)       | 155 (1.5)                    | <0.0001               |

| Characteristic                        | Total           | Neither pre-preg | Pre-preg        | HDP alone       | Both pre-preg   | p-value <sup>  </sup> |
|---------------------------------------|-----------------|------------------|-----------------|-----------------|-----------------|-----------------------|
|                                       |                 | HTN nor HDP      | HTN alone       |                 | HTN and HDP     |                       |
| n (%) or mean $\pm$ SD                | N=433,430       | N=353,575 (81.6) | N=1,591 (0.4)   | N=68,212 (15.7) | N=10,052 (2.3)  |                       |
| Early preterm (28 to <34)             | 8,381 (1.9)     | 4,543 (1.3)      | 70 (4.4)        | 2,968 (4.4)     | 800 (8.0)       |                       |
| Late preterm (34 to <37)              | 30,172 (7.0)    | 20,154 (5.7)     | 164 (10.3)      | 8,279 (12.1)    | 1,575 (15.7)    |                       |
| $\geq$ 37                             | 392,559 (90.6)  | 327,320 (92.6)   | 1,337 (84.0)    | 56,382 (82.7)   | 7,520 (74.8)    |                       |
| Birth weight (g)                      | 3,266 $\pm$ 571 | 3,302 $\pm$ 533  | 3,156 $\pm$ 669 | 3,123 $\pm$ 677 | 2,971 $\pm$ 765 | <0.0001               |
| Birth weight for gestational age (g)  |                 |                  |                 |                 |                 |                       |
| Appropriate for gestational age       | 347,433 (80.2)  | 286,576 (81.1)   | 1,218 (76.6)    | 52,147 (76.4)   | 7,492 (74.5)    | <0.0001               |
| Small for gestational age             | 44,017 (10.2)   | 33,281 (9.4)     | 187 (11.8)      | 9,030 (13.2)    | 1,519 (15.1)    |                       |
| Large for gestational age             | 41,704 (9.6)    | 33,484 (9.5)     | 184 (11.6)      | 6,997 (10.3)    | 1,039 (10.3)    |                       |
| Induction                             | 68,600 (15.8)   | 51,322 (14.5)    | 255 (16.0)      | 14,935 (21.9)   | 2,088 (20.8)    | <0.0001               |
| Previous preterm births               | 14,824 (3.4)    | 10,550 (3.0)     | 108 (6.8)       | 3,429 (5.0)     | 737 (7.3)       | <0.0001               |
| Prenatal care as measured by R-GINDEX |                 |                  |                 |                 |                 |                       |
| Inadequate                            | 77,290 (17.8)   | 65,644 (18.6)    | 219 (13.8)      | 10,265 (15.0)   | 1,162 (11.6)    | <0.0001               |
| Intermediate                          | 95,623 (22.1)   | 80,178 (22.7)    | 279 (17.5)      | 13,540 (19.8)   | 1,626 (16.2)    |                       |
| Adequate                              | 6,735 (1.6)     | 5,330 (1.5)      | 25 (1.6)        | 1,222 (1.8)     | 158 (1.6)       |                       |
| Intensive                             | 123,550 (28.5)  | 94,610 (26.8)    | 576 (36.2)      | 23,890 (35.0)   | 4,474 (44.5)    |                       |
| No Care                               | 4,137 (1.0)     | 3,316 (0.9)      | 14 (0.9)        | 718 (1.1)       | 89 (0.9)        |                       |

| Characteristic | Total           | Neither pre-preg<br>HTN nor HDP | Pre-preg<br>HTN alone | HDP alone             | Both pre-preg<br>HTN and HDP | p-value <sup>  </sup> |
|----------------|-----------------|---------------------------------|-----------------------|-----------------------|------------------------------|-----------------------|
|                | <hr/> N=433,430 | <hr/> N=353,575 (81.6)          | <hr/> N=1,591 (0.4)   | <hr/> N=68,212 (15.7) | <hr/> N=10,052 (2.3)         |                       |
| Missing        | 126,095 (29.1)  | 104,497 (29.6)                  | 478 (30.0)            | 18,577 (27.2)         | 2,543 (25.3)                 |                       |

BMI, body mass index; HDP, hypertensive disorders of pregnancy; HTN, hypertension; pre-preg, pre-pregnancy; R-GINDEXT, Revised-Graduated Prenatal Care Utilization Index; SD, standard deviation.

\* Data includes person-level diagnostic codes at time of discharge or birth certificate. Hypertensive disorders of pregnancy (HDP) were defined as gestational hypertension, pre-eclampsia, or eclampsia (International Classification of Diseases, Ninth and Tenth Revision, Clinical Modification [ICD-9-CM/ICD-10-CM]: 642.3-642.7; O11.x, O13.x-16.x) by hospitalization/emergency department (ED) visit data, or gestational hypertension as reported on the birth certificate. Pre-pregnancy hypertension was based on hospitalization/ED visit data or birth certificates.

† For smoking during pregnancy, gestational age at delivery, and birth weight for gestational age, ≤0.1% of data are missing and not shown.

‡ Variables with >0.1% missing data included: BMI at delivery, n=1,760; and prenatal care as measured by R-GINDEXT, n=126,095.

§ Smoking during pregnancy, BMI at delivery, gestational age at delivery, birth weight, induction, and previous preterm births were available from the birth certificate.

<sup>||</sup> *P-values* were calculated by Chi-square tests for categorical variables or analysis of variance (ANOVA) for continuous variables.
